# Supplementary material
Source: publisher site journal article supplement (https://www.dovepress.com/get_supplementary_file.php?f=475534.docx)
Supplement: Supplementary file 1 [file get_supplementary_file.php]

**Supplemental Materials**

**A Prediction Nomogram of Severe Obstructive Sleep Apnea in Patients with Obesity Based on the Liver Stiffness and Abdominal Visceral Adipose Tissue Quantification**

Anbang Zhao1,2*, Bin Hao1,2*, Simin Liu3*, Xiaoyu Qiu1,2*, Xiaoping Ming1,2, Xiuping Yang1,2, Jie Cai1,2, Zhen Li4,5, Xiong Cheng1,2

1Department of Otorhinolaryngology, Head and Neck Surgery, Zhongnan Hospital of Wuhan University, Wuhan, China;

2Sleep Medicine Center, Zhongnan Hospital of Wuhan University, Wuhan, China;

3Department of Neurosurgery, Union Hospital Tongji Medical College Huazhong University of Science and Technology, Wuhan, China;

4Department of Hepatobiliary and Pancreatic Surgery, Zhongnan Hospital of Wuhan University, Wuhan, China;

5Bariatric and Metabolic Disease Surgery Center, Zhongnan Hospital of Wuhan University, Wuhan, China;

*These authors contributed equally to this work

Correspondence: Xiong Cheng, Department of Otorhinolaryngology, Head and Neck Surgery, Zhongnan Hospital of Wuhan University, Wuhan, China, Email: [zn_chenxiong@whu.edu.com;](mailto:zn_chenxiong@whu.edu.com;) Zhen Li, Department of Hepatobiliary and Pancreatic Surgery, Zhongnan Hospital of Wuhan University, Wuhan, China, Email: kamel_li@163.com.

| Variables | *P*-valuea | OR |
| --- | --- | --- |
| Age | 0.578 | 0.953 (0.806 - 1.128) |
| aVAT | 0.845 | 0.999 (0.987 - 1.011) |
| Waist circumference | 0.289 | 0.902 (0.746 - 1.091) |
| ALT | 0.346 | 0.993 (0.978 - 1.008) |
| AST | 0.883 | 0.998 (0.975 - 1.022) |
| γ-GGT | 0.712 | 0.998 (0.986 - 1.010) |
| ALP | 0.906 | 0.998 (0.959 - 1.038) |
| TBIL | 0.230 | 1.094 (0.945 - 1.267) |
| TC | 0.489 | 0.571 (0.117 - 2.791) |
| TG | 0.239 | 0.851 (0.651 - 1.113) |
| HDL | 0.859 | 1.780 (0.003 - 1022.429) |
| LDL | 0.018 | 6.128 (1.364 - 27.537) |
| FFA | 0.976 | 1.000 (0.997 - 1.003) |
| HOMA-IR | 0.726 | 1.016 (0.928 - 1.114) |

eTable 1. Linear relationship between dependent variable and all continuous variables in training cohort

aBoxTidwell test

**Abbreviations:** OR, odds ratio; aVAT, abdominal visceral adipose tissue; ALT, alanine aminotransferase; AST, aspartate aminotransferase; γ-GGT, γ-glutamyl transpeptidase; ALP, Alkaline phosphatase; TBIL, Total bilirubin; TC, total cholesterol; TG, triglyceride; HDL, high-density lipoprotein; LDL, low-density lipoprotein; FFA, free fatty acids; HOMA-IR, homeostasis model assessment insulin resistant.

eTable 2. Variance inflation factors for full training cohort.

| Variables | Step1 | | Step2 | |
| --- | --- | --- | --- | --- |
| VIF | Tolerance | VIF | Tolerance |
| Biological sex | 1.747 | 0.572 | 1.645 | 0.608 |
| Age | 1.314 | 0.761 | 1.297 | 0.771 |
| LSM | 1.253 | 0.798 | 1.245 | 0.803 |
| CAP | 1.217 | 0.822 | 1.213 | 0.824 |
| aVAT | 1.792 | 0.558 | 1.791 | 0.558 |
| BMI | 1.930 | 0.518 | 1.929 | 0.518 |
| Waist circumference | 2.664 | 0.375 | 2.644 | 0.378 |
| Diabetes mellitus | 1.418 | 0.705 | 1.415 | 0.707 |
| Hyperuricemia | 1.236 | 0.809 | 1.235 | 0.810 |
| ALT | 5.759 | 0.174 | 1.667 | 0.600 |
| AST | 5.169 | 0.193 | - | - |
| γ-GGT | 1.693 | 0.591 | 1.690 | 0.592 |
| ALP | 1.124 | 0.890 | 1.124 | 0.890 |
| TBIL | 1.202 | 0.832 | 1.196 | 0.836 |
| TC | 2.253 | 0.444 | 2.252 | 0.444 |
| TG | 1.845 | 0.542 | 1.845 | 0.542 |
| HDL | 1.481 | 0.675 | 1.479 | 0.676 |
| LDL | 1.657 | 0.604 | 1.647 | 0.607 |
| FFA | 1.316 | 0.760 | 1.307 | 0.765 |
| HOMA-IR | 1.414 | 0.707 | 1.414 | 0.707 |

**Abbreviations:** LSM, liver stiffness measurement; CAP, controlled attenuation parameter; aVAT, abdominal visceral adipose tissue; BMI, body mass index; ALT, alanine aminotransferase; AST, aspartate aminotransferase; γ-GGT, γ-glutamyl transpeptidase; ALP, Alkaline phosphatase; TBIL, Total bilirubin; TC, total cholesterol; TG, triglyceride; HDL, high-density lipoprotein; LDL, low-density lipoprotein; FFA, free fatty acids; HOMA-IR, homeostasis model assessment insulin resistant; VIF, variance inflation factor.

eTable 3. General characteristics of the patients and univariate logistic regression analyses for screening associations

| Variables | Non-Severe OSA  (n = 354) | Severe OSA  (n = 351) | *P*-value | OR | OR 95% CI | |
| --- | --- | --- | --- | --- | --- | --- |
| **Biological sex, n (%)** |  |  | <0.001a | 7.166 | 4.658 | 11.024 |
| Male | 30 (8.48 %) | 140 (39.89 %) |  |  |  |  |
| Female | 324 (91.52 %) | 211 (60.11 %) |  |  |  |  |
| **Age, years, median (P25-P75)** | 31 (26 - 37) | 34 (30 - 40) | <0.001b | 1.060 | 1.038 | 1.082 |
| **BMI, n (%)** |  |  | <0.001a | 3.717 | 2.716 | 5.086 |
| ≤37.4 kg/m2 | 251 (70.90 %) | 139 (39.60 %) |  |  |  |  |
| >37.4 kg/m2 | 103 (29.10 %) | 212 (60.40 %) |  |  |  |  |
| **Waist circumference,**  **cm,median (P25-P75)** | 110 (103 - 120) | 120 (112 - 129) | <0.001b | 1.057 | 1.043 | 1.070 |
| **Comorbidity, n (%)** |  |  |  |  |  |  |
| Diabetes mellitus | 82 (23.16 %) | 146 (41.60 %) | <0.001a | 2.362 | 1.706 | 3.272 |
| Hyperuricemia | 147 (41.53 %) | 224 (63.82 %) | <0.001a | 2.484 | 1.834 | 3.364 |
| **Image examinations** |  |  |  |  |  |  |
| LSM, n (%) |  |  | <0.001a | 3.916 | 2.810 | 5.456 |
| <12.4 kpa | 281 (79.38 %) | 174 (49.57 %) |  |  |  |  |
| ≥12.4 kpa | 73 (20.62 %) | 177 (50.43 %) |  |  |  |  |
| CAP, n (%) |  |  | <0.001a | 4.616 | 2.349 | 9.072 |
| ≤296 dB/m | 46 (12.99 %) | 11 (3.13 %) |  |  |  |  |
| >296 dB/m | 308 (87.01 %) | 340 (96.87 %) |  |  |  |  |
| aVAT, cm2, median (P25-P75) | 145.66  (113.68 - 178.00) | 217.81  (166.19 - 290.68) | <0.001b | 1.016 | 1.013 | 1.018 |
| **Laboratory examinations** |  |  |  |  |  |  |
| ALT, U/L, median (P25-P75) | 28 (18 - 52) | 44 (26 - 76) | <0.001b | 1.010 | 1.006 | 1.014 |
| γ-GGT, U/L, median (P25-P75) | 29 (20 - 45) | 41 (28 - 63) | <0.001b | 1.014 | 1.009 | 1.020 |
| ALP, U/L, median (P25-P75) | 75 (64 - 88) | 80 (69 - 95) | 0.002b | 1.011 | 1.004 | 1.019 |
| TBIL, umol/L, median (P25-P75) | 11.75(9.30-15.30) | 12.20(9.90-15.75) | 0.118b | 1.023 | 0.994 | 1.053 |
| TC, mmol/L, median (P25-P75) | 4.90 (4.35 - 5.36) | 5.09 (4.46 - 5.84) | 0.004b | 1.252 | 1.076 | 1.457 |
| TG, mmol/L, median (P25-P75) | 1.53 (1.13 - 2.10) | 1.91 (1.42 - 2.70) | <0.001b | 1.338 | 1.164 | 1.538 |
| HDL, mmol/L, median (P25-P75) | 1.10 (0.97 - 1.28) | 1.02 (0.90 - 1.16) | <0.001b | 0.188 | 0.094 | 0.378 |
| Elevated LDL, n (%) |  |  | <0.001a | 2.169 | 1.384 | 3.399 |
| <4.14 mmol/L | 321 (90.68 %) | 287 (81.77 %) |  |  |  |  |
| ≥4.14 mmol/L | 33 (9.32 %) | 64 (18.23 %) |  |  |  |  |
| FFA, umol/L, median (P25-P75) | 541.70  (388.30 - 705.90) | 574.10  (431.00 - 716.05) | 0.205b | 1.000 | 1.000 | 1.001 |
| HOMA-IR | 5.36 (3.54 - 8.08) | 7.45 (4.99 - 10.94) | <0.001b | 1.109 | 1.072 | 1.148 |

aChi-square test, bMann–Whitney *U* test

**Abbreviations:** OSA, obstructive sleep apnea; CI, confidence interval; OR, odds ratio;BMI, body mass index; LSM, liver stiffness measurement; CAP, controlled attenuation parameter; aVAT, abdominal visceral adipose tissue; ALT, alanine aminotransferase; γ-GGT, γ-glutamyl transpeptidase; ALP, Alkaline phosphatase; TBIL, Total bilirubin; TC, total cholesterol; TG, triglyceride; HDL, high-density lipoprotein; LDL, low-density lipoprotein; FFA, free fatty acids; HOMA-IR, homeostasis model assessment insulin resistant.

eTable 4. Simplified model for multivariate logistic regression analyses for screening associations

| Variables | Non-Severe OSA  (n = 354) | Severe OSA  (n = 351) | *P*-value | OR | OR 95% CI | |
| --- | --- | --- | --- | --- | --- | --- |
| **Biological sex, n (%)** |  |  | <0.001a | 4.071 | 2.420 | 6.848 |
| Male | 30 (8.48 %) | 140 (39.89 %) |  |  |  |  |
| Female | 324 (91.52 %) | 211 (60.11 %) |  |  |  |  |
| **Age, years, median (P25-P75)** | 31 (26 - 37) | 34 (30 - 40) | <0.001b | 1.093 | 1.063 | 1.124 |
| **BMI, n (%)** |  |  | <0.001a | 2.601 | 1.725 | 3.923 |
| ≤37.4 kg/m2 | 251 (70.90 %) | 139 (39.60 %) |  |  |  |  |
| >37.4 kg/m2 | 103 (29.10 %) | 212 (60.40 %) |  |  |  |  |
| **LSM, n (%)** |  |  | <0.001a | 2.181 | 1.453 | 3.273 |
| <12.4 kpa | 281 (79.38 %) | 174 (49.57 %) |  |  |  |  |
| ≥12.4 kpa | 73 (20.62 %) | 177 (50.43 %) |  |  |  |  |
| **aVAT, cm2, median (P25-P75)** | 145.66  (113.68 - 178.00) | 217.81  (166.19 - 290.68) | <0.001b | 1.009 | 1.006 | 1.012 |
| **Elevated LDL, n (%)** |  |  | 0.003a | 2.225 | 1.310 | 3.781 |
| <4.14 mmol/L | 321 (90.68 %) | 287 (81.77 %) |  |  |  |  |
| ≥4.14 mmol/L | 33 (9.32 %) | 64 (18.23 %) |  |  |  |  |

aChi-square test, bMann–Whitney *U* test

**Abbreviations:** OSA, obstructive sleep apnea; CI, confidence interval; OR, odds ratio; BMI, body mass index; LSM, liver stiffness measurement; aVAT, abdominal visceral adipose tissue; LDL, low-density lipoprotein.
